# Supplementary material
Source: PubMed Central journal article supplement (PMC9364679)
Supplement: NIHMS1809010-supplement-1.pdf [file NIHMS1809010-supplement-1.pdf]

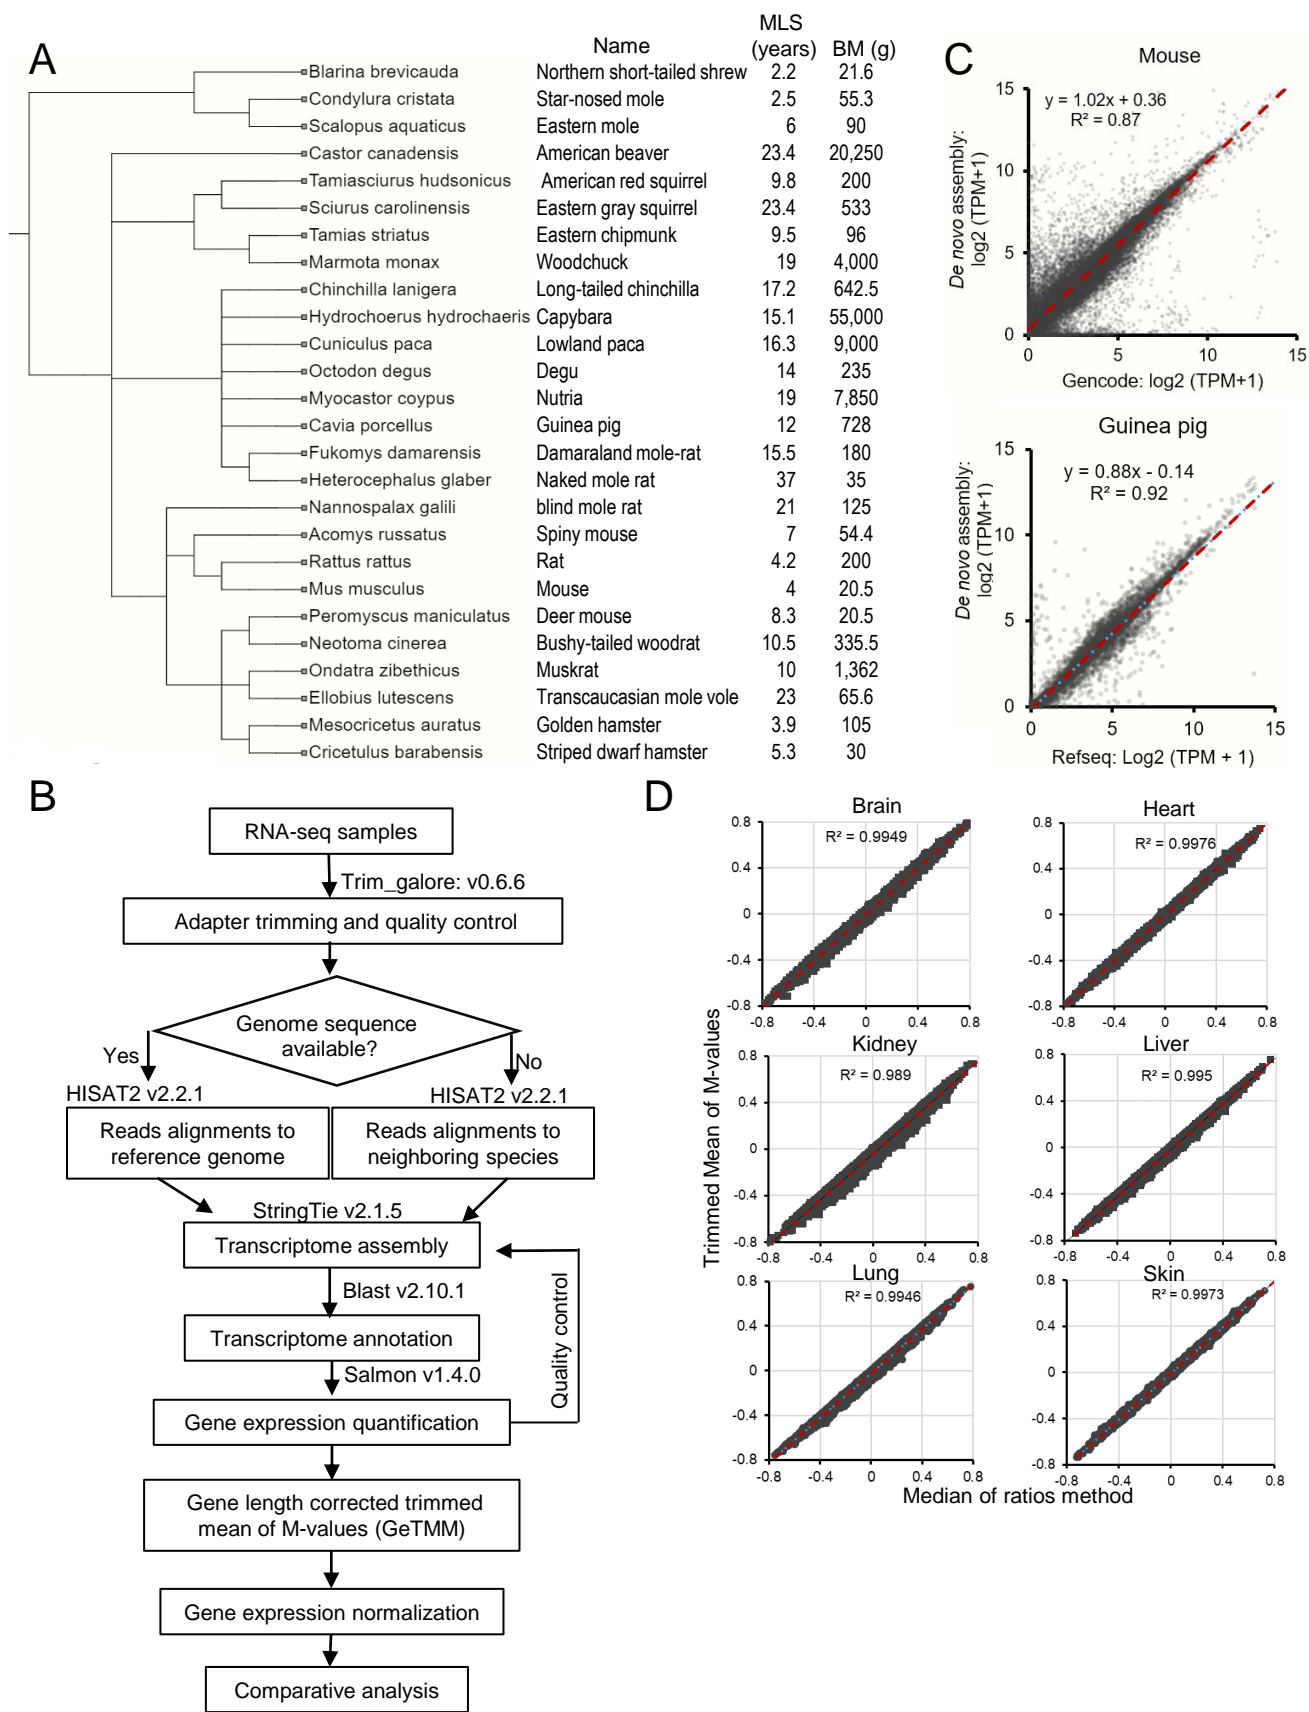

**Figure S1. Workflow of comparative transcriptomics and quality control. Related to Figure 1.**

(A) A phylogenetic tree of species used in this study. Corresponding MLS and body mass are also shown.

(B) Workflow showing the comparative transcriptomics.

(C) Scatter plots showing the comparison of gene expression from *de novo* transcriptome assembly in this study (y-axis) and public Gencode or Refseq annotations (x-axis). Mouse and guinea pig are shown as examples. Transcript per million (TPM) was used to represent the relative gene expression levels.

(D) Scatter plots showing the comparison of normalization methods including Median of ratios method (x-axis) and trimmed mean of M-values (y-axis). High consistency between the two methods was observed.

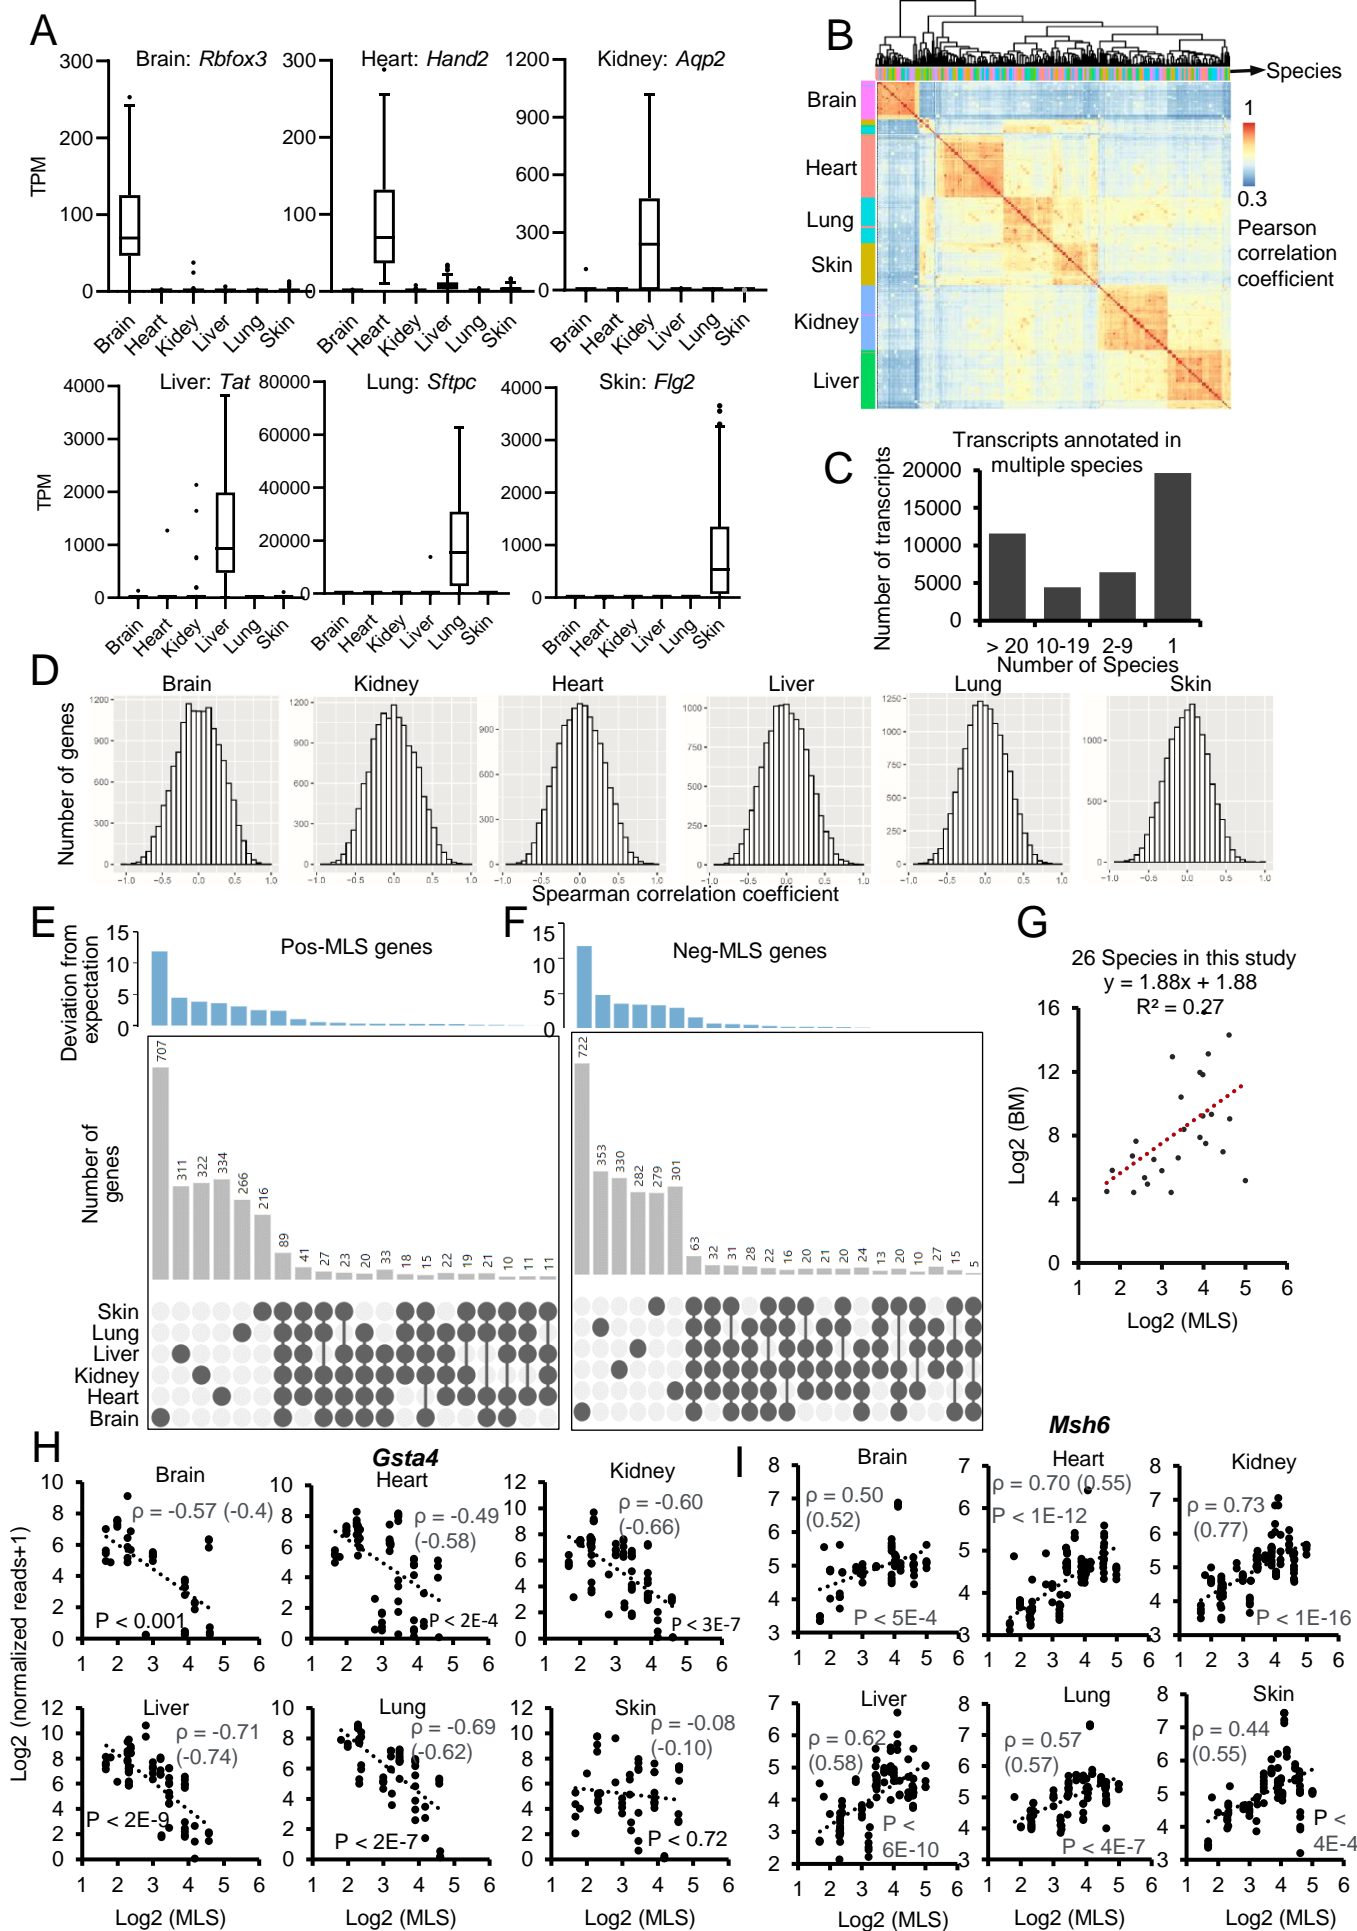

**Figure S2. Overlap of Pos- and Neg-MLS genes identified in 6 tissues. Related to Figure 1.**

(A) Boxplots showing the gene expression of tissue-specific marker genes in six tissues.

(B) Hierarchical clustering of all RNA-seq samples. Samples were clustered by tissues instead of species.

(C) The barplot showing the number of homologous genes that can be identified across species. The x-axis indicates the number of species. The y-axis indicates the number of homologous transcripts.

(D) Histogram plots showing the distribution of Spearman correlation coefficients between gene expression and MLS.

(E-F) Upset plots showing the overlap of Pos-MLS (E) and Neg-MLS (F) genes identified in 6 tissues. The categories were ranked by deviations from the expected cardinality.

(G) The scatter plot showing the correlation of MLS (years) and body mass (g).

(H-I) Scatter plots showing the relative gene expression level of *Gsta4* (H) and *Msh6* (I) in six tissues across species with different MLS. Spearman correlation coefficients ( $\rho$ ) of gene expression and MLS are also shown. Phylogenetically corrected values for  $\rho$  are shown in parenthesis.

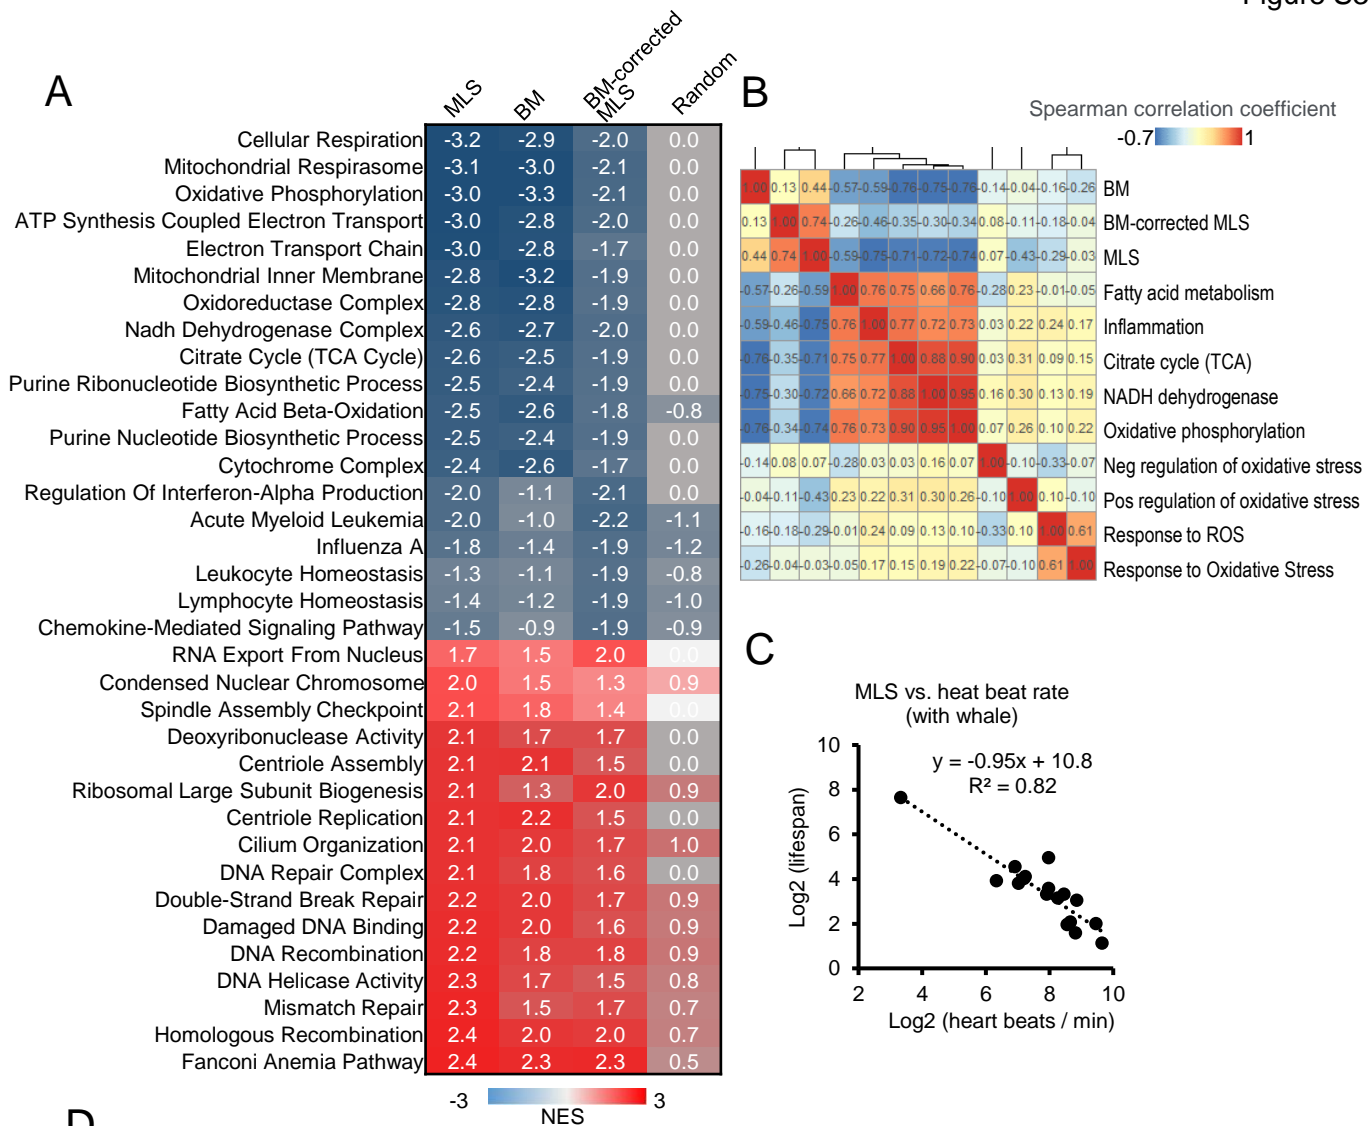

**D**

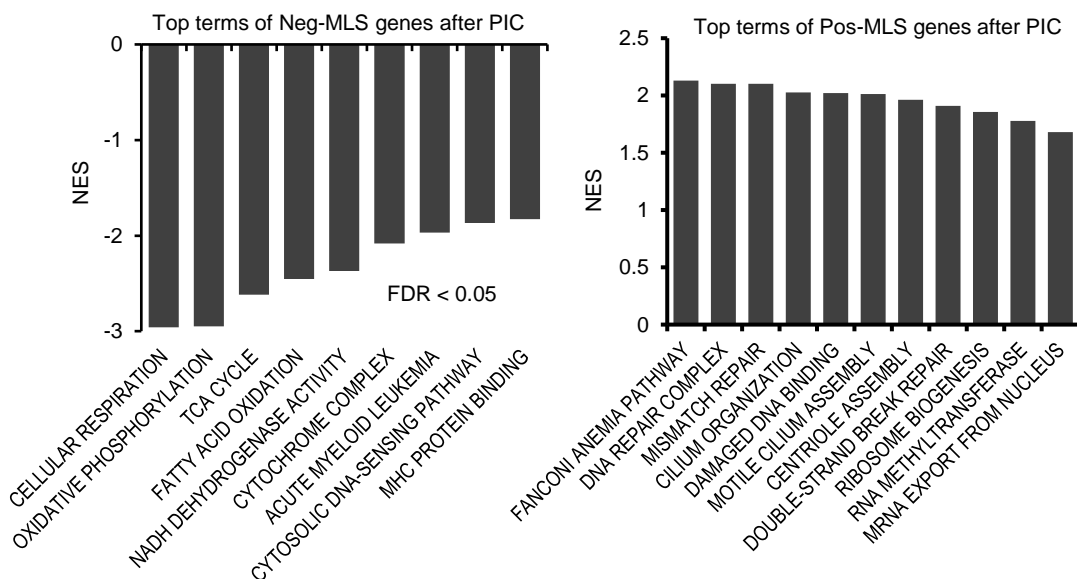

**Figure S3. GSEA with gene expression after correction for BM and phylogenetically independent contrasts. Related to Figures 2-3.**

(A) Heatmap plot showing the normalized enrichment scores of GSEA with genes ranked by the Spearman correlation coefficients of gene expression with BM, MLS and BM-corrected MLS, respectively.

(B) Hierarchical clustering based on average gene expression of Neg-MLS involved in different categories. The numbers shown in the heatmap are Spearman correlation coefficients. Genes used for each category were from GO and KEGG. NADH dehydrogenase: GO\_0010257 and GO\_0003954; Fatty acid metabolism: GO\_0019395; Oxidative phosphorylation: GO\_0006119; Citrate cycle (TCA): map00020; Cellular response to reactive oxygen species: GO\_0034614; Cellular response to oxidative stress : GO\_0034599; Negative regulation of response to oxidative stress: GO\_1902883; Positive regulation of response to oxidative stress: GO\_1902884; Inflammation: GO\_0002526, GO\_0002260, GO\_0001776, GO\_0032647 and GO\_0070098.

(C) Scatter plot showing the relationship of heartbeat rate and MLS across species.

(D) Top enriched terms identified by GSEA with Neg-MLS (left) and Pos-MLS (right) gene expression after phylogenetically independent contrasts as inputs.

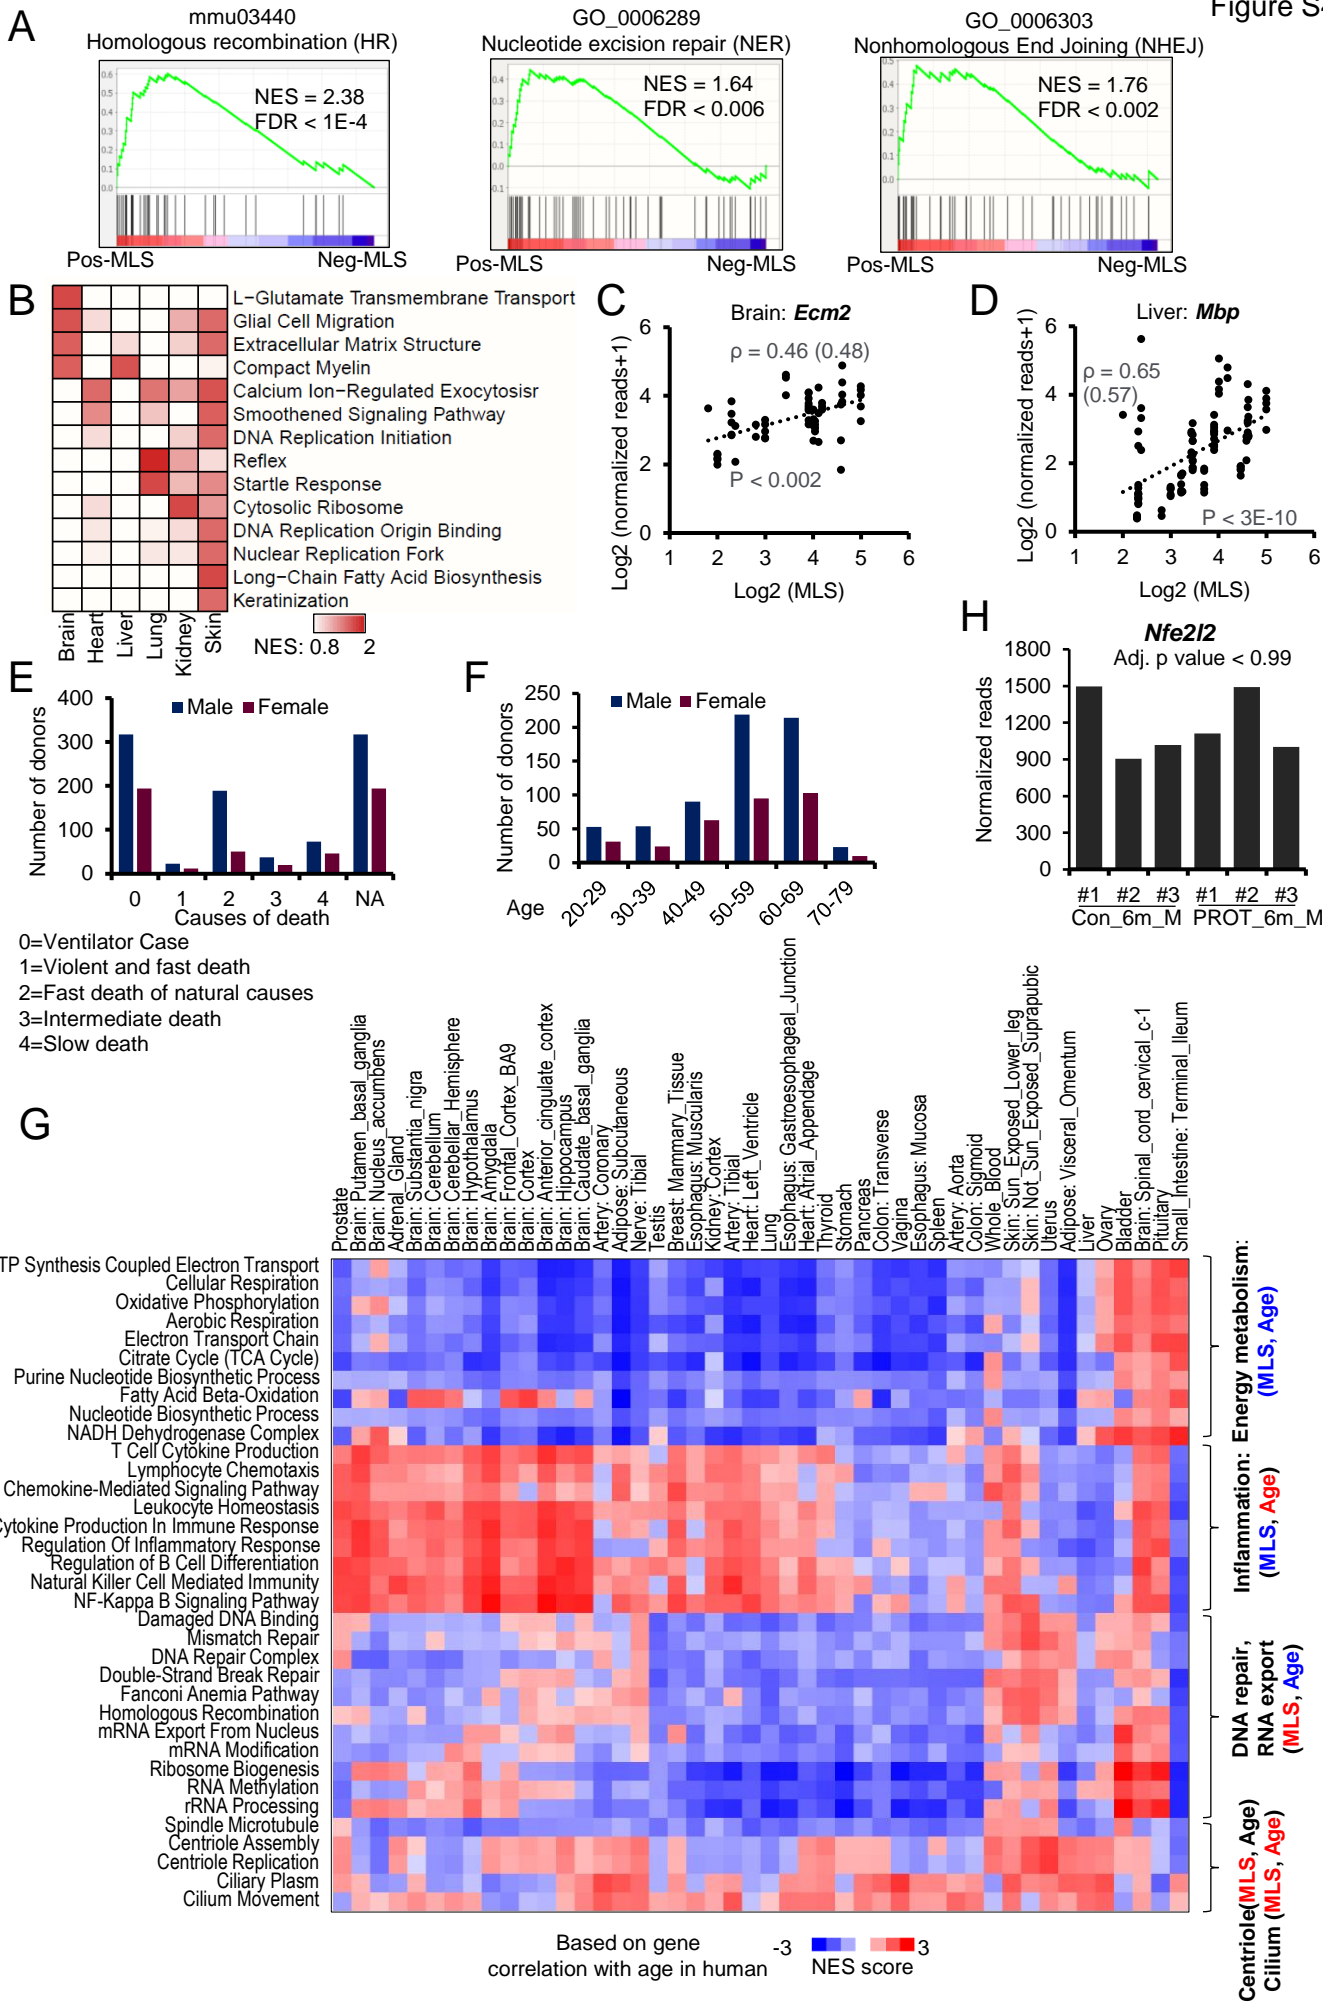

**Figure S4. Expression of MLS-associated genes during human aging. Related to Figure 3.**

(A) GSEA plots showing global enrichment of representative GO or KEGG terms including mmu03440\_Homologous recombination, GO\_0006289\_Nucleotide excision repair and nonhomologous end joining. NES and FDR values are shown in the plots.

(B) The heatmap showing the tissues-specific functional terms that Pos-MLS genes are enriched in. Colors indicate NES values from GSEA in each tissue. Functional terms enriched across all tissues (Figure 3A) are not shown to avoid redundancy.

(C-D) Scatter plots showing the relative expression level of *Ecm2* (C) and *Mbp* (D) in the brain and liver across species.

(E) Cause of death distribution of donors for human gene expression data from GTEx.

(F) Age distribution of donors for human gene expression data from GTEx.

(G) The heatmap showing NES of MLS-associated pathways based on the correlation of gene expression with age. Negative NES values shown in Blue indicate expression of genes involved in this pathway tend to negatively correlate with age, i.e. downregulated during human aging. Positive NES values shown in Red indicate expression of genes involved in this pathway tend to positively correlate with age, i.e. upregulated during human aging. Gene expression data is from GTEx.

(H) Barplot showing the relative expression of *Nfe2l2* in the control mice and mice treated with Protandim (tissue: Liver; dose: 1200 ppm; duration: 2 months). RNA-seq data was from GSE131901.



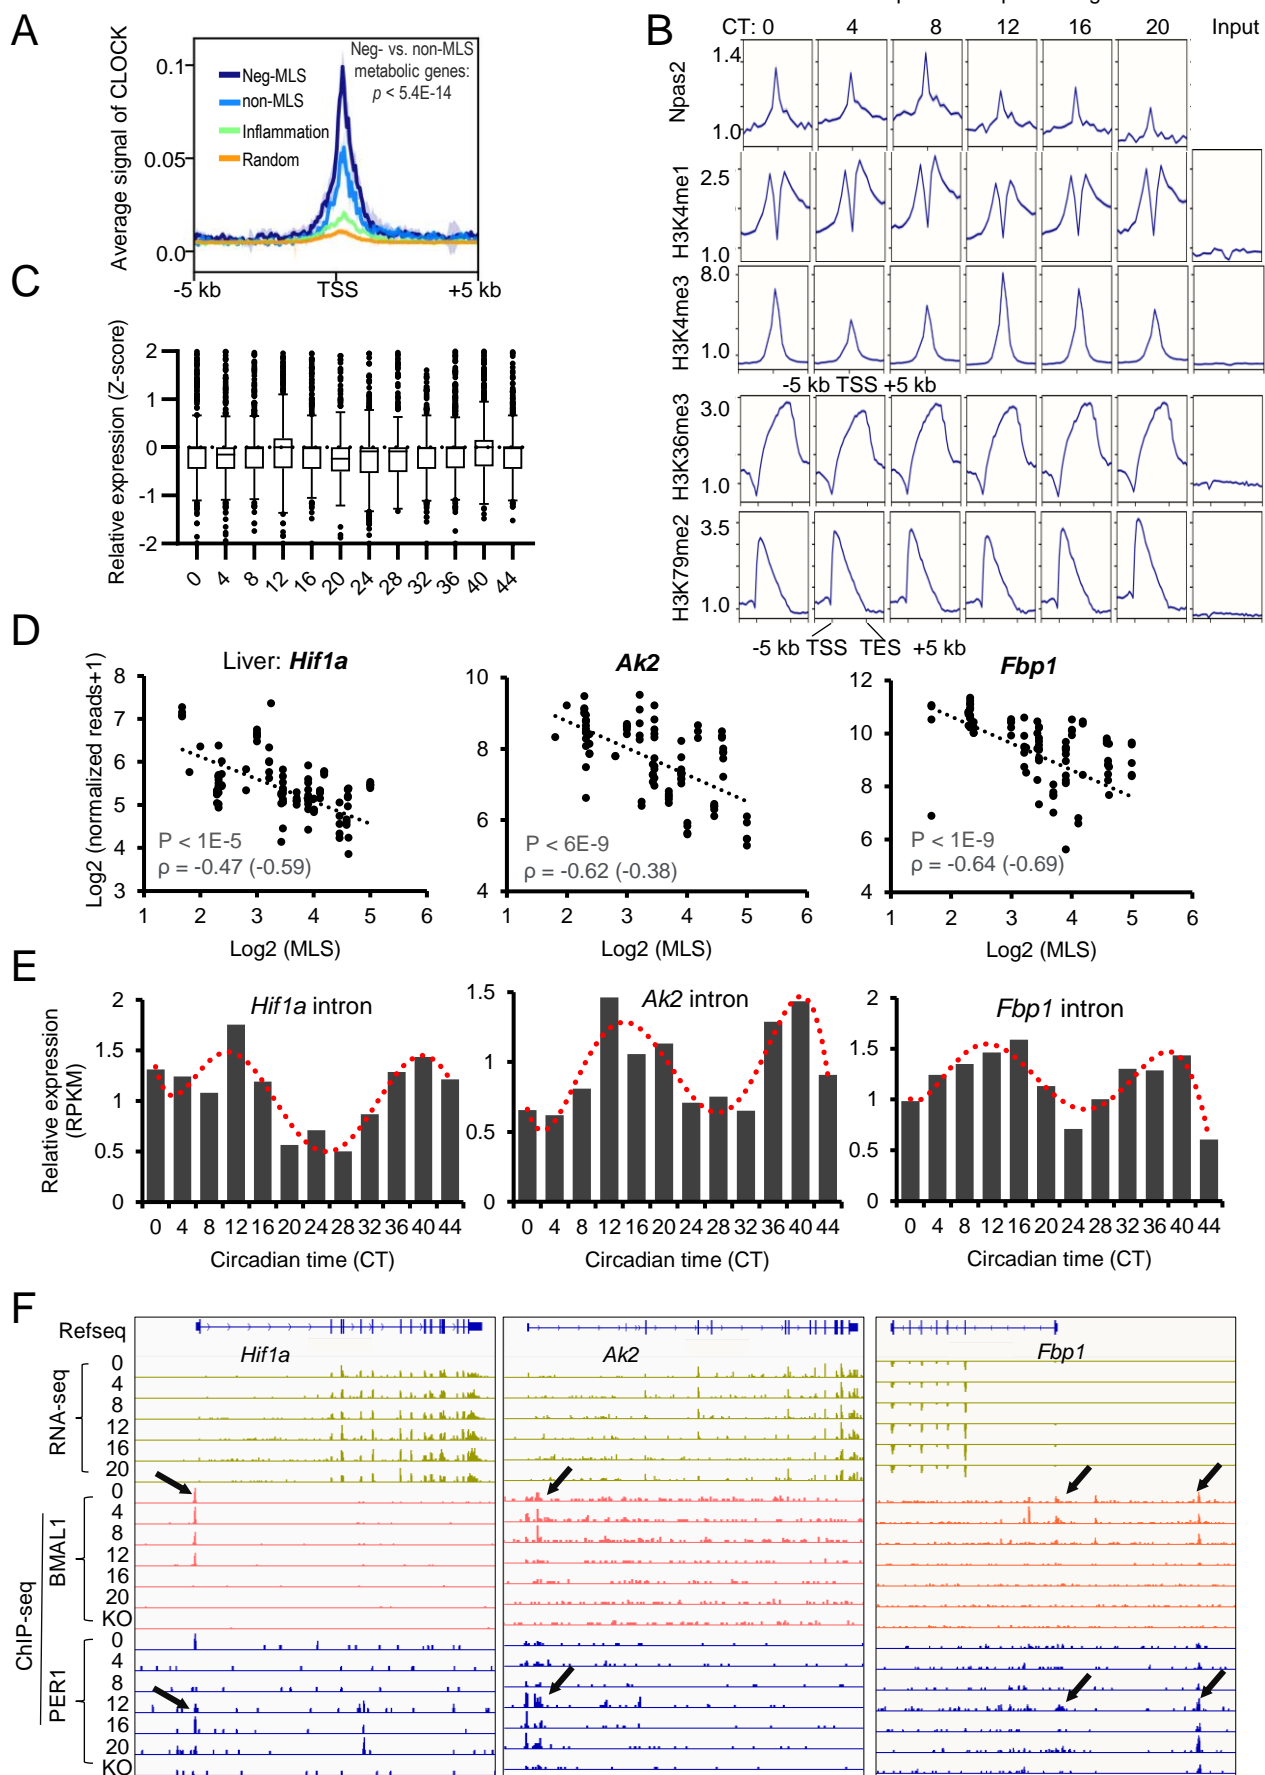

**Figure S5. Transcriptomic and epigenomic signatures of Neg-MLS genes during circadian cycle. Related to Figure 5.**

(A) Metagene analysis showing differential binding activities of circadian regulator CLOCK in mouse liver at Neg-MLS gene involved in cellular respiratory based energy metabolism or inflammation, and metabolic genes that correlated with MLS or not. Five kb around the TSS regions are shown. Genes involved in cellular respiratory-based energy metabolism were identified in Figure S3B. Liver ChIP-seq data is from (Annayev et al., 2014).

(B) Metagene analysis showing dynamic binding activities of circadian regulator Npas2 and histone modifications at Neg-MLS genes in mouse liver. Five kb around the TSS regions are shown for H3K4me1 and H3K4me3. Five kb around the TSS and TES regions are shown for late and early elongation histone modification markers H3K36me3 and H3K79me2. ChIP-seq data is from (Koike et al., 2012).

(C) Boxplots showing the dynamic transcriptional activity of random genes with low circadian factor binding in two circadian cycles. CT, circadian time. All genes were ranked by their TSS occupancy of circadian factors and genes shown in boxplot were randomly selected from genes with a lower 50% of circadian factors binding. All MLS-associated genes are excluded.

(D) Scatter plots showing the relative gene expression levels of *Hif1a* (left), *Ak2* (middle) and *Fbp1* (right) in the liver across species with different MLS. Spearman correlation coefficients ( $\rho$ ) of gene expression and MLS are shown. Phylogenetically corrected values for  $\rho$  are shown in parenthesis.

(E) The barplots showing the dynamic transcription of *Hif1a* (left), *Ak2* (middle) and *Fbp1* (right) genes in two circadian cycles.

(F) Tracks of *Hif1a* (left), *Ak2* (middle) and *Fbp1* (right) genomic regions. The RNA-seq and ChIP-seq of BMAL1 (activator) and PER1 (repressor) are shown. The arrows highlight the binding sites of BMAL1 and PER1. RNA-seq and ChIP-seq are from (Koike et al., 2012).

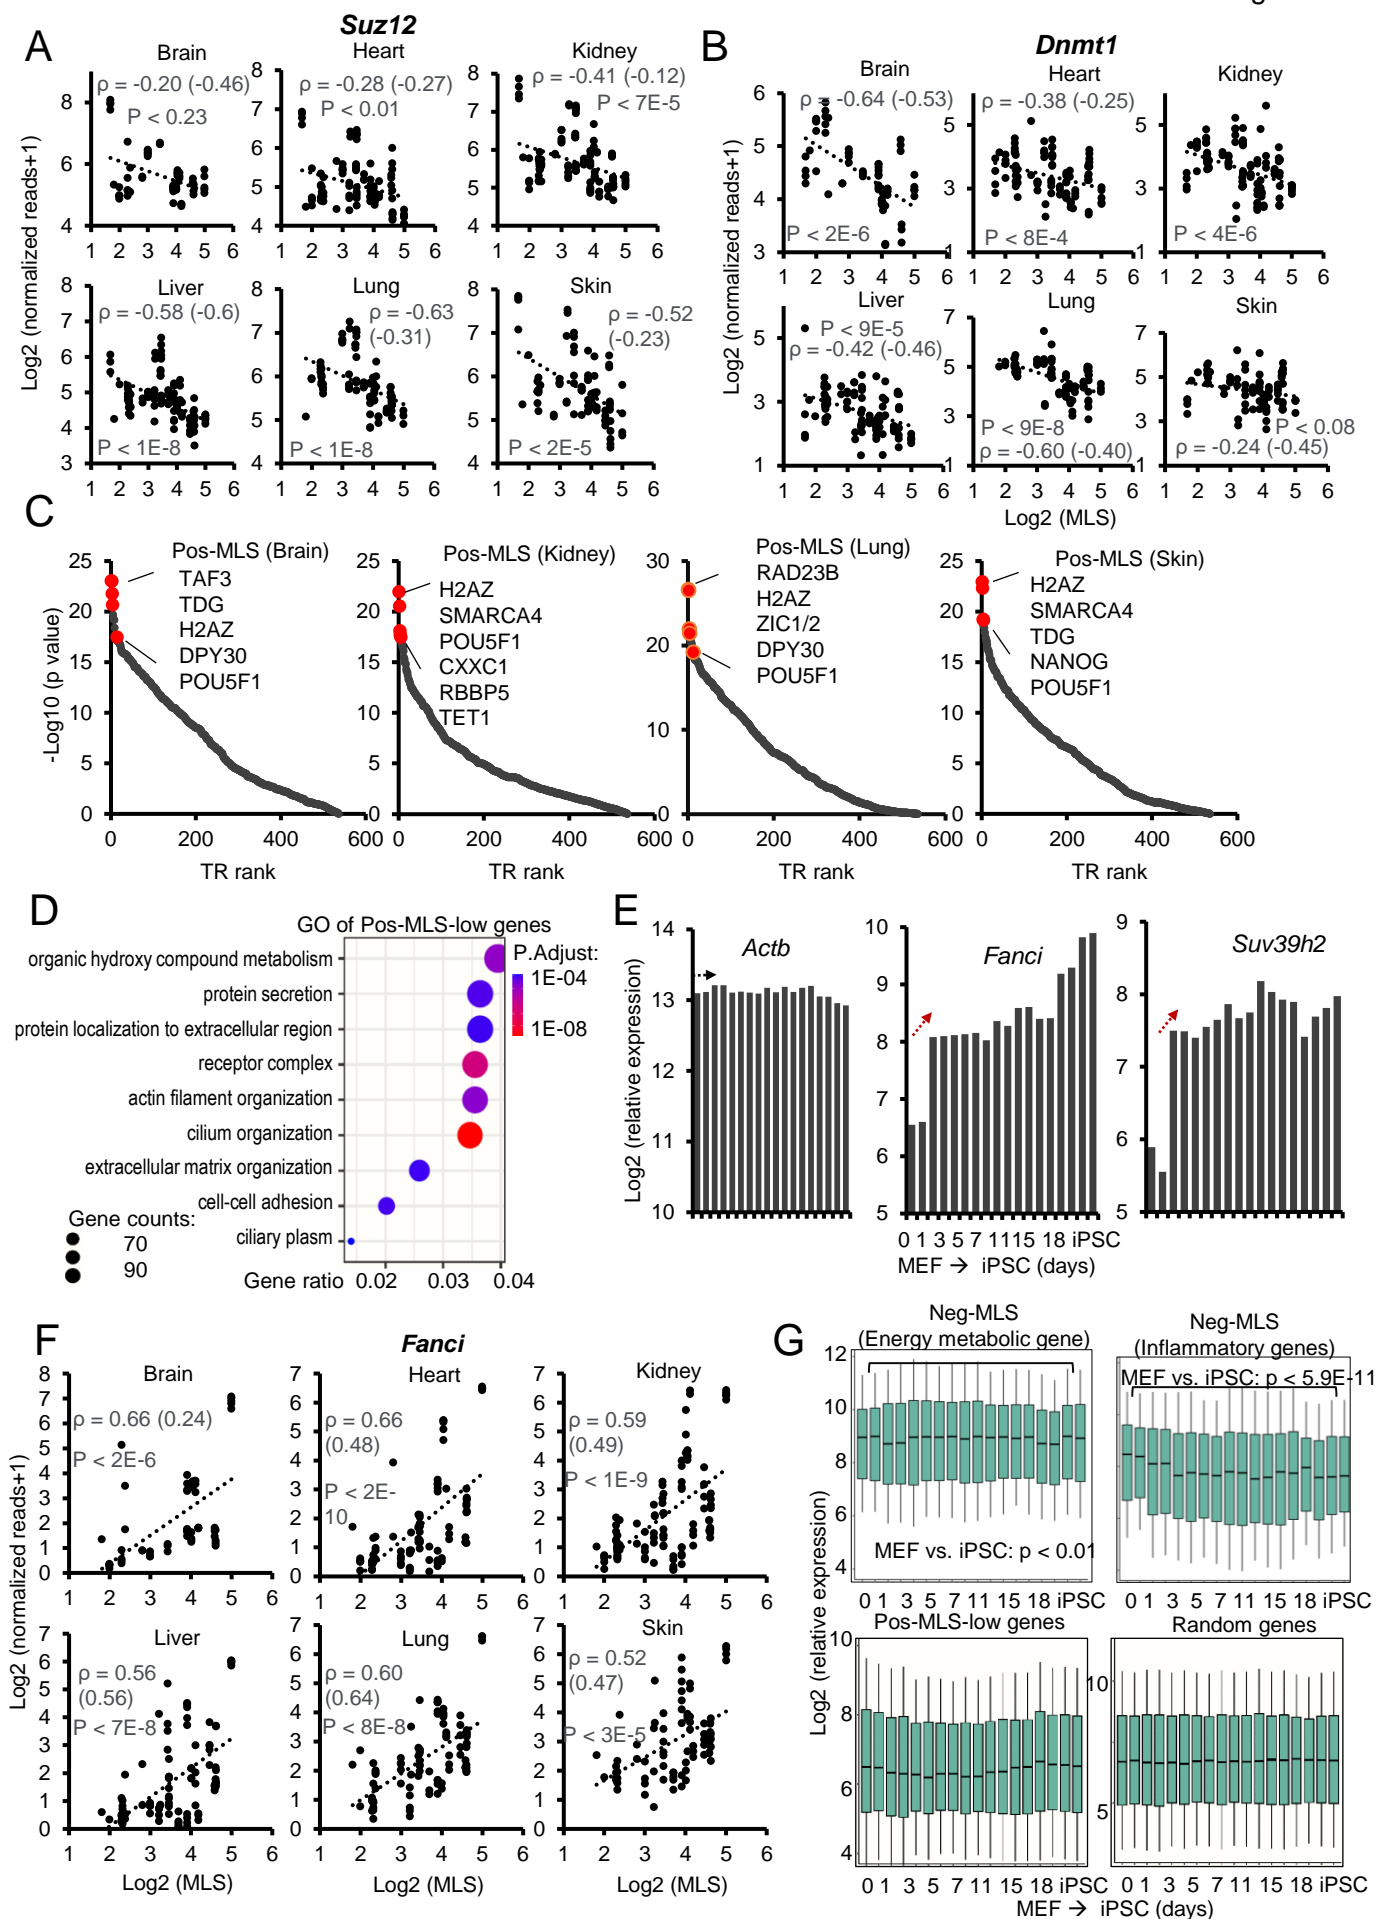

**Figure S6. Upregulation of Pos-MLS genes during somatic cell reprogramming. Related to Figure 6.**

(A-B) Scatter plots showing the relative gene expression level of *Suz12* (A) in PRC2 complex and *Dnmt1*(B) the liver across species. Spearman correlation coefficients ( $\rho$ ) of gene expression and MLS were shown. Phylogenetically corrected values for  $\rho$  are shown in parenthesis.

(C) Scatter plots showing the TR rank of Pos-MLS genes in the brain, kidney, lung and skin. The Y-axis indicates the  $p$  values that are calculated using the Wilcoxon rank test comparison of the Pos-MLS genes and background. Top regulators with the lowest  $p$  values are highlighted in red.

(D) The dot plot showing the GO enrichment of genes in the Pos-MLS-low clusters. The colors indicate the BH-adjusted  $p$  values. The dot sizes indicate the number of genes.

(E) Barplots showing the relative expression of *Actb* (left), *Fanci* (middle) and *Suv39h2* (right) genes during the OSKM-induced somatic reprogramming. Log<sub>2</sub> scale of the intensity in CHIP array is shown. Arrows indicate the direction of change in gene expression.

(F) Scatter plots showing the relative gene expression levels of *Fanci* in the six tissues across species. Spearman correlation coefficients ( $\rho$ ) of gene expression and MLS are shown. Phylogenetically corrected values for  $\rho$  are shown in parenthesis.

(G) Boxplot showing the expression of Neg-MLS (up) genes, Pos-MLS-low genes (bottom) and random genes (bottom) during the OSKM-induced somatic reprogramming.  $p$  values are calculated using two-tailed Student's t-test. RNA-seq data are from (Chen et al., 2016).

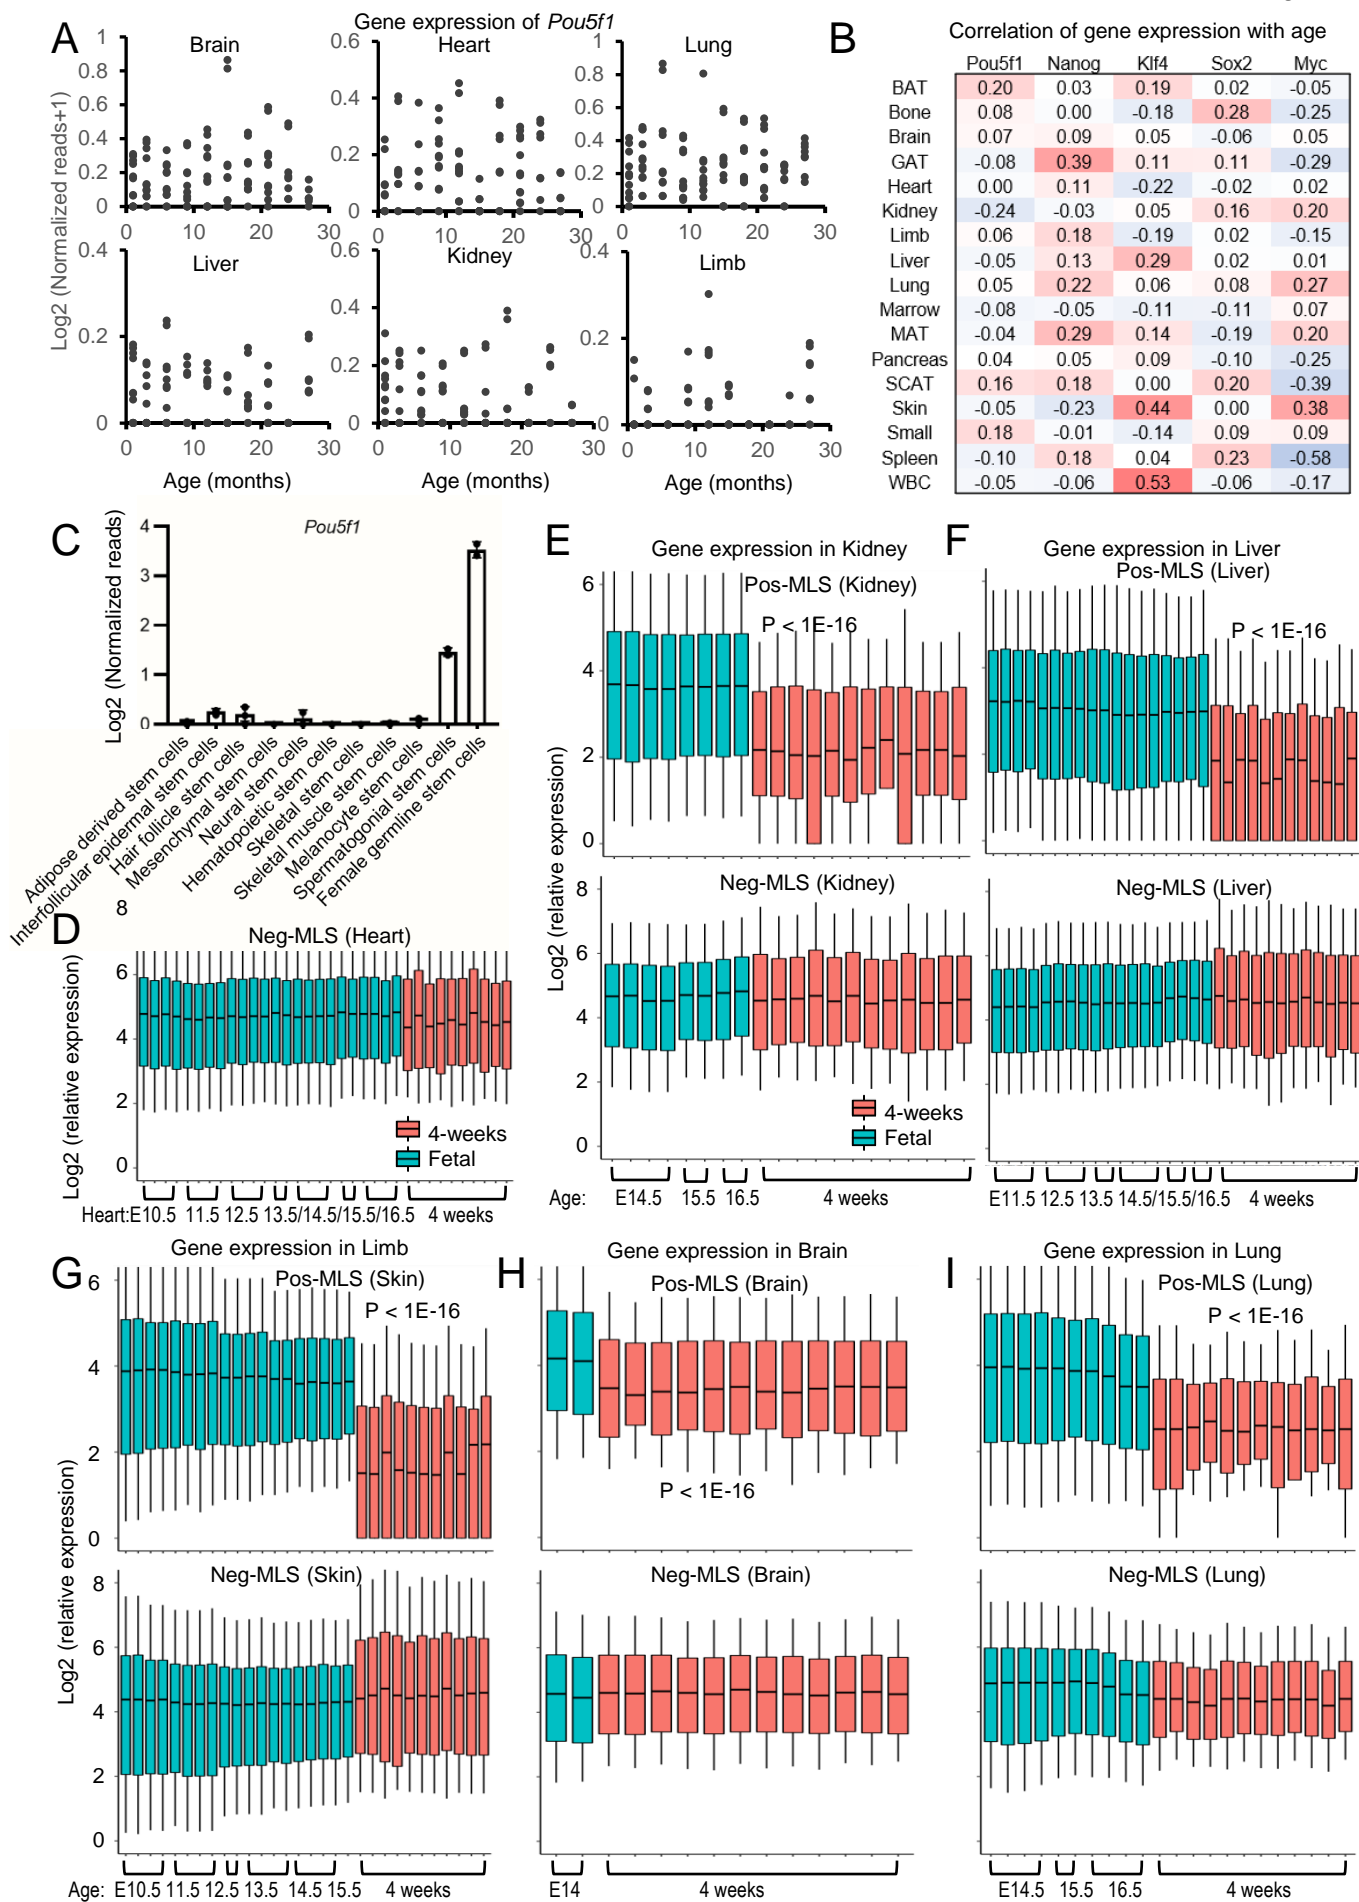

**Figure S7. Differential expression of Pos-MLS genes between fetal and postnatal tissues. Related to Figure 7.**

(A) Gene expression of *Pou5f1* in six tissues during aging. Raw reads were normalized by the Trimmed Mean of M-values method.

(B) Spearman correlation coefficients of gene expression with age across 17 tissues during aging.

(C) Barplot showing the gene expression of *Pou5f1* in adult stem cells.

(D) Boxplot showing the expression of Neg-MLS genes identified in the heart. Gene expression of the fetal heart is shown in light blue. Gene expression of the postnatal heart (4-weeks old) is shown in orange. p values were calculated using two-tailed Student's t-test.

(E-I) Boxplot showing the gene expression of Pos- and Neg-MLS genes identified in the Kidney (E), Liver (F), Skin (G), Brain (H) and Lung (I). Gene expression of fetal tissues is shown in light blue. Gene expression of the postnatal tissues (4-weeks old) is shown in orange. p values were calculated using two-tailed Student's t-test.
